# Supplementary material for: [(CH3)2NH2]2PdBr4, a layered hybrid halide perovskite semiconductor with improved optical and electrical properties
Source: Royal Society of Chemistry journal article supplement (doi:10.1039/d3ra04085b), 2023-01-01
Supplement: d3ra04085b1.pdf [file d3ra04085b1.pdf]

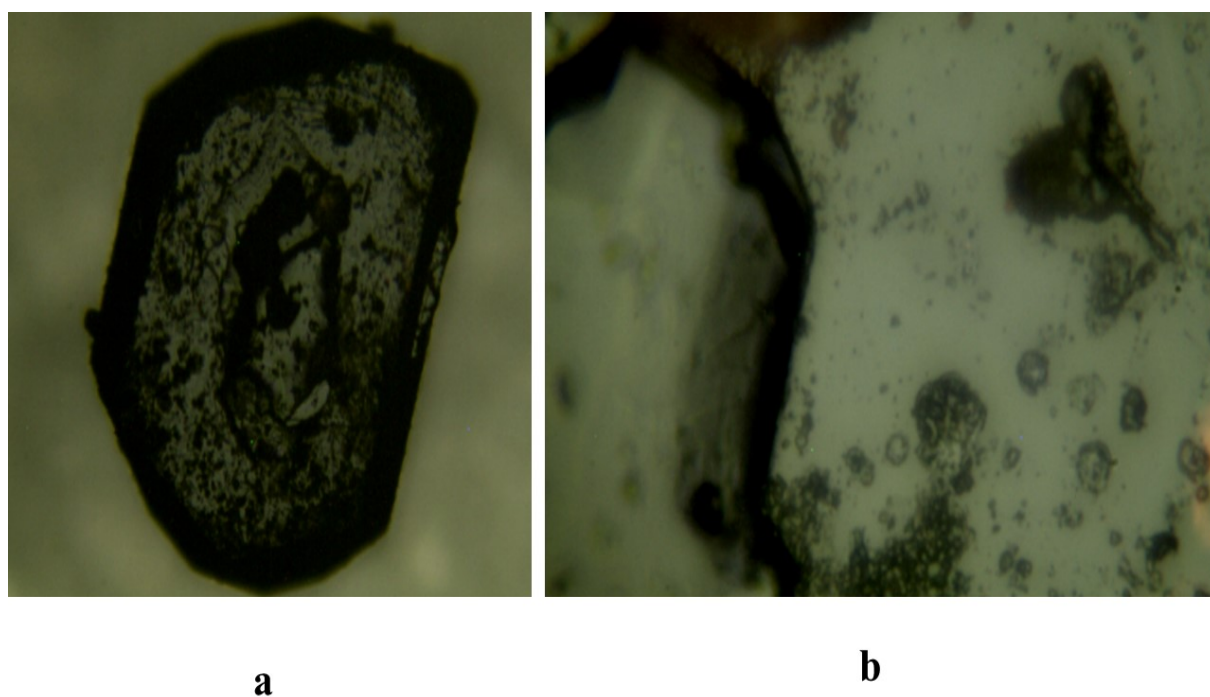

**Figure. S1:** (a) Micrograph shows the dimensions of crystal for  $[(\text{CH}_3)_2\text{NH}_2]_2\text{PdBr}_4$   
(b) the image of the surface of the crystal taken with the objective  $\times 50$  of a microscope.

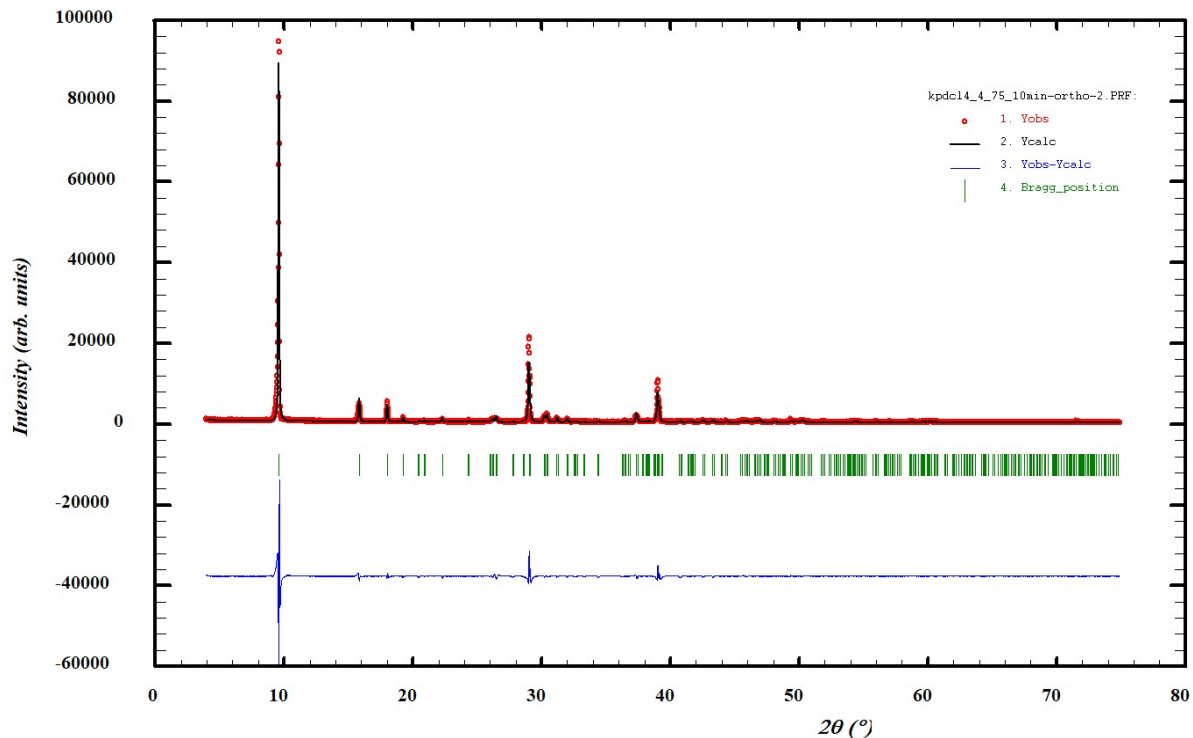

**Figure. S2:** Plot of the Bail fit of the powder X-ray diffraction pattern recorded at 293 K for  $[(\text{CH}_3)_2\text{NH}_2]_2\text{PdBr}_4$ :  $Cmca$ ,  $a = 18.4521(8)$  Å,  $b = 7.3181(8)$  Å,  $c = 9.8482(9)$  Å;  $R_p = 13.9$ ,  $R_{wp} = 21.8$ ,  $R_{exp} = 3.53$ .
